# Supplementary material for: Surface-subsurface interaction analysis and the influence of precipitation spatial variability on a lowland mesoscale catchment
Source: Copernicus journal article supplement (doi:10.5194/hess-2023-276), 2023-12-20
Supplement: Supplementary file 1 [file hess-2023-276-supplement.pdf]

# Surface-subsurface interaction analysis and the influence of precipitation spatial variability on a lowland mesoscale catchment

Faisal Sardar<sup>1</sup>, Muhammad Haris Ali<sup>1,2</sup>, Ioana Popescu<sup>1,2</sup>, Andreja Jonoski<sup>1</sup>, Schalk Jan van Andel<sup>1</sup>, Claudia Bertinia<sup>1</sup>

<sup>1</sup>Department of Hydroinformatics and Socio-Technical Innovation, IHE Delft Institute for Water Education, P.O. Box 3015, 2601 DA Delft, The Netherlands

<sup>2</sup>Water Resources Section, Delft University of Technology, 2628 CD Delft, The Netherlands

Correspondence to: Muhammad Haris Ali ([h.ali@un-ihe.org](mailto:h.ali@un-ihe.org))

## Supplementary material

Table S1: calibration weights for each variable

| Discharge location                             | Weights | Evapotranspiration locations     | Weights             |
|------------------------------------------------|---------|----------------------------------|---------------------|
| Outlet                                         | 0.4     | CCP, PAS, LPOA, NIAL             | 0.1                 |
| At Middle                                      | 0.3     | DUF, CF, MF, NG, IM              | 0.05                |
| At Border                                      | 0.3     |                                  |                     |
| Groundwater location                           | Weights |                                  |                     |
| GWL Points                                     | 0.08    |                                  |                     |
| CCP - Complex cultivation Pattern              |         | DUF - Discontinuous urban fabric | IM - Inland marshes |
| PAS - Pastures                                 |         | NIAL - Non-irrigated arable land | MF - Mixed forest   |
| APOA- Land principally occupied by agriculture |         | NG - Natural grassland           | CF - Conifer forest |

Table S2: Model component and parameters for sensitivity analysis

| Component      | Parameter                             |
|----------------|---------------------------------------|
| Channel Flow   | • Manning's roughness coefficient (M) |
|                | • Leakage Coefficient                 |
| Saturated Zone | • Horizontal hydraulic conductivity   |
|                | • Vertical hydraulic conductivity     |
|                | • Specific yield                      |
|                | • Specific storage                    |
| Drainage       | • Time Constant                       |

Table S3: Model validation parameters and data source

| Parameter                    | Details                                                                                                                             |
|------------------------------|-------------------------------------------------------------------------------------------------------------------------------------|
| Precipitation                | 2017-2018: Dutch part: Radar Data<br>Belgium part: IDW interpolated data<br><br>2019-2021: Complete radar data<br>(Meteobase, n.d.) |
| Reference Evapotranspiration | Gilze-Rijen Weather station (Time series)                                                                                           |
| Observed streamflow's        | Waterschap Brabantse Delta                                                                                                          |
| Groundwater levels           | Waterschap Brabantse Delta &<br>Dinoloket (Data and information on the Dutch subsurface)                                            |

Table S4: Model performance results for streamflow, GWL, and actual evapotranspiration for the calibration period (2010-2016) and validation period (2017-2021)

| Name                | Calibrated Model |       | Validated Model |       |
|---------------------|------------------|-------|-----------------|-------|
|                     | R                | NSE   | R               | NSE   |
| <b>Streamflow's</b> |                  |       |                 |       |
| At Outlet           | 0.90             | 0.78  | 0.89            | 0.71  |
| In the middle       | 0.78             | 0.61  | 0.84            | 0.65  |
| At Belgium Boarder  | 0.76             | 0.57  | 0.84            | 0.62  |
| <b>Groundwater</b>  |                  |       |                 |       |
| 5219                | 0.79             | -0.08 | 0.93            | 0.85  |
| 5332                | 0.82             | 0.38  | 0.83            | 0.29  |
| 5170                | 0.92             | 0.83  | 0.85            | 0.71  |
| 5165                | 0.81             | 0.43  | 0.71            | 0.41  |
| B50COO77            | 0.92             | 0.57  | 0.87            | 0.30  |
| B50C0079            | 0.91             | 0.52  | 0.86            | 0.63  |
| B50C0078            | 0.81             | 0.56  | 0.86            | 0.53  |
| B49F0231            | 0.61             | 0.33  | -               | -     |
| B50A0234            | 0.88             | 0.40  | -               | -     |
| 1-0344              | 0.65             | 0.34  | 0.70            | 0.28  |
| 1-0347              | 0.96             | -0.23 | 0.92            | -0.40 |
| 1-0342              | 0.74             | 0.45  | 0.76            | 0.36  |

1-0170                      0.89                      0.79                      0.55                      -0.10

| Name                      | Calibrated Model |      | Validated Model |       |
|---------------------------|------------------|------|-----------------|-------|
|                           | R                | NSE  | R               | NSE   |
| <b>Evapotranspiration</b> |                  |      |                 |       |
| CCP(20,31)                | 0.85             | 0.71 | 0.84            | 0.69  |
| CCP(38,57)                | 0.87             | 0.72 | 0.82            | 0.67  |
| DUF(42,61)                | 0.88             | 0.54 | 0.71            | 0.27  |
| DUF(18,18)                | 0.88             | 0.73 | 0.85            | 0.68  |
| PAS(20,27)                | 0.84             | 0.68 | 0.83            | 0.66  |
| PAS(33,12)                | 0.86             | 0.70 | 0.82            | 0.64  |
| CCP(27,11)                | 0.89             | 0.36 | 0.86            | 0.14  |
| APOA(18,34)               | 0.83             | 0.66 | 0.82            | 0.59  |
| NIAL(17,27)               | 0.84             | 0.66 | 0.85            | 0.68  |
| ACF(14,42)                | 0.66             | 0.18 | 0.60            | 0.08  |
| MF(26,43)                 | 0.85             | 0.12 | 0.82            | -0.22 |
| NG(27,45)                 | 0.82             | 0.55 | 0.79            | 0.42  |
| IM(18,10)                 | 0.83             | 0.62 | 0.82            | 0.62  |

CCP – Complex cultivation pattern                      CF- Conifer forest  
DUF – Discontinuous urban fabric                      NG-Natural grassland  
NIAL - Non-irrigated arable land                      IM – Inland marshes  
APOA- Land principally occupied by agriculture                      MF- Mixed forest  
PAS - Pastures

Table S5: Detailed catchment water balance for the calibrated and validated period (2010-2021)

| Water balance component (mm) | Calibrated<br>(2010-2016) | Validated<br>(2017-2021) |
|------------------------------|---------------------------|--------------------------|
| Precipitation                | 6149                      | 4000                     |
| Evapotranspiration           | 3518                      | 2554                     |
| Overland flow to river       | 240                       | 99                       |
| Infiltration                 | 2596                      | 1504                     |
| Base flow to river           | 192                       | 99                       |
| SZ drains to river           | 1421                      | 610                      |
| UZ Storage change            | -96                       | -108                     |

|                   |     |     |
|-------------------|-----|-----|
| SZ storage change | 255 | 250 |
|-------------------|-----|-----|

Table S6: Detailed catchment water balance for the wet and dry hydrological years

| <b>Water balance component (mm)</b> | <b>Wet Hydrological Year-<br/>(2010)</b> | <b>Dry Hydrological Year-<br/>(2018)</b> |
|-------------------------------------|------------------------------------------|------------------------------------------|
| Precipitation                       | 923                                      | 757                                      |
| Evapotranspiration                  | 476                                      | 531                                      |
| Overland flow to river              | 25                                       | 25                                       |
| Infiltration                        | 379                                      | 241                                      |
| Base flow to river                  | 21                                       | 21                                       |
| SZ drains to river                  | 148                                      | 146                                      |
| UZ Storage change                   | 53                                       | -28                                      |
| SZ storage change                   | 111                                      | -41                                      |

Table S7: Detailed catchment water balance with different precipitation representation

| <b>Water balance component<br/>(mm)</b> | <b>Theisen<br/>Polygon</b> | <b>Inverse Distance<br/>Weighting</b> | <b>Radar</b> |
|-----------------------------------------|----------------------------|---------------------------------------|--------------|
| Precipitation                           | 6239                       | 6243                                  | 6149         |
| Evapotranspiration                      | 3538                       | 3548                                  | 3518         |
| Overland flow to river                  | 253                        | 249                                   | 240          |
| Infiltration                            | 2656                       | 2654                                  | 2596         |
| Base flow to river                      | 191                        | 191                                   | 192          |
| SZ drains to river                      | 1474                       | 1471                                  | 1421         |
| UZ Storage change                       | -95                        | -95                                   | -96          |
| SZ storage change                       | 256                        | 256                                   | 255          |

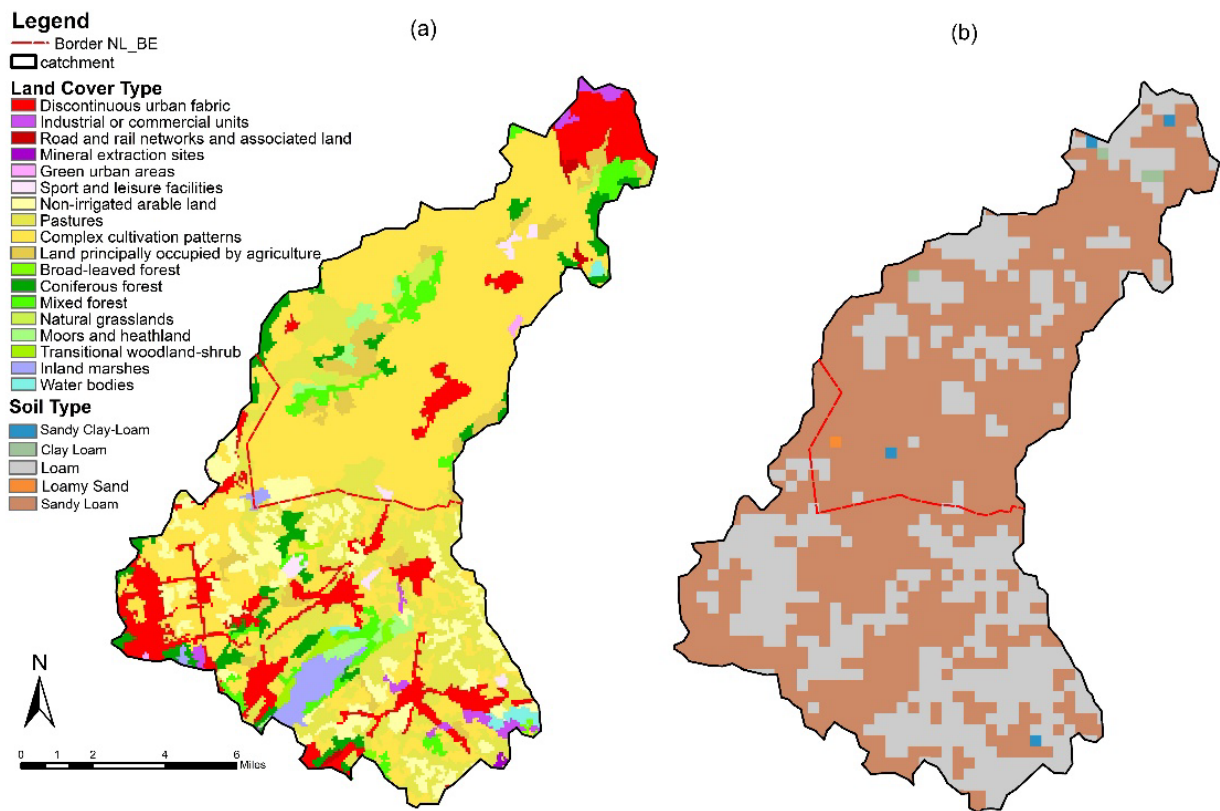

Figure S1: (a) Corine Land Use type (Copernicus, 2018) (b) Soil Type ESDAC (Ballabio, et al., 2016)

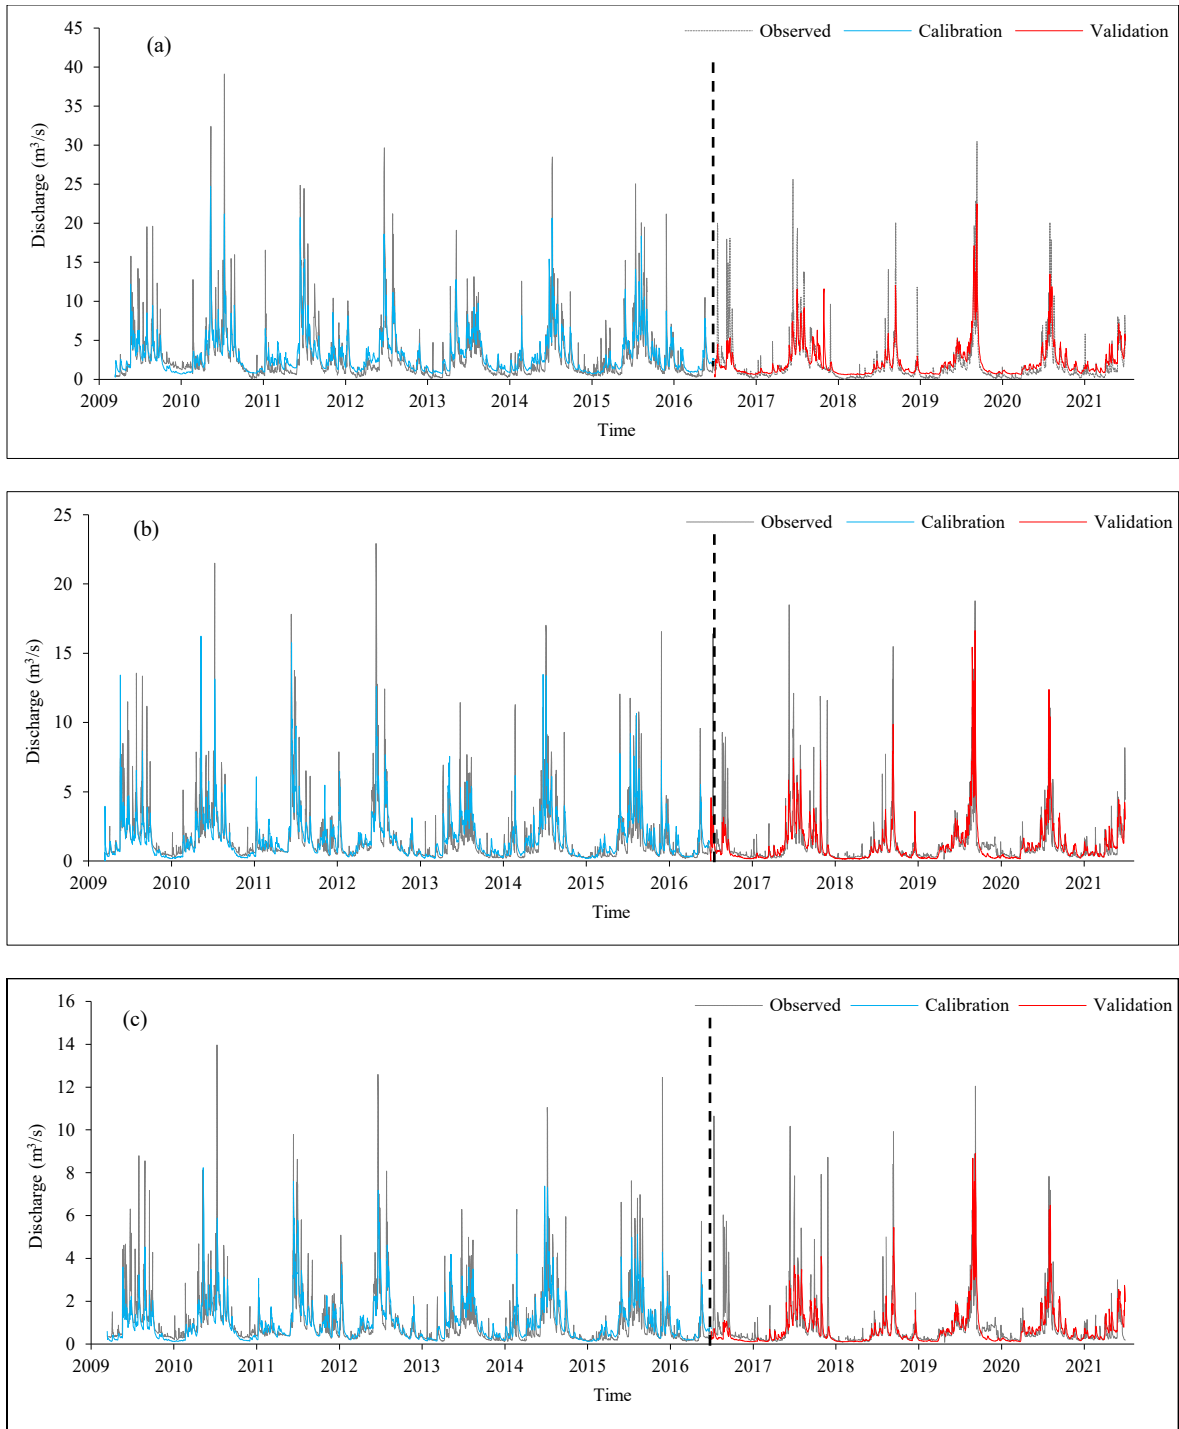

Figure S2: Streamflow's variation for calibration and validation period at (a) Outlet (b) Middle (c) At Border

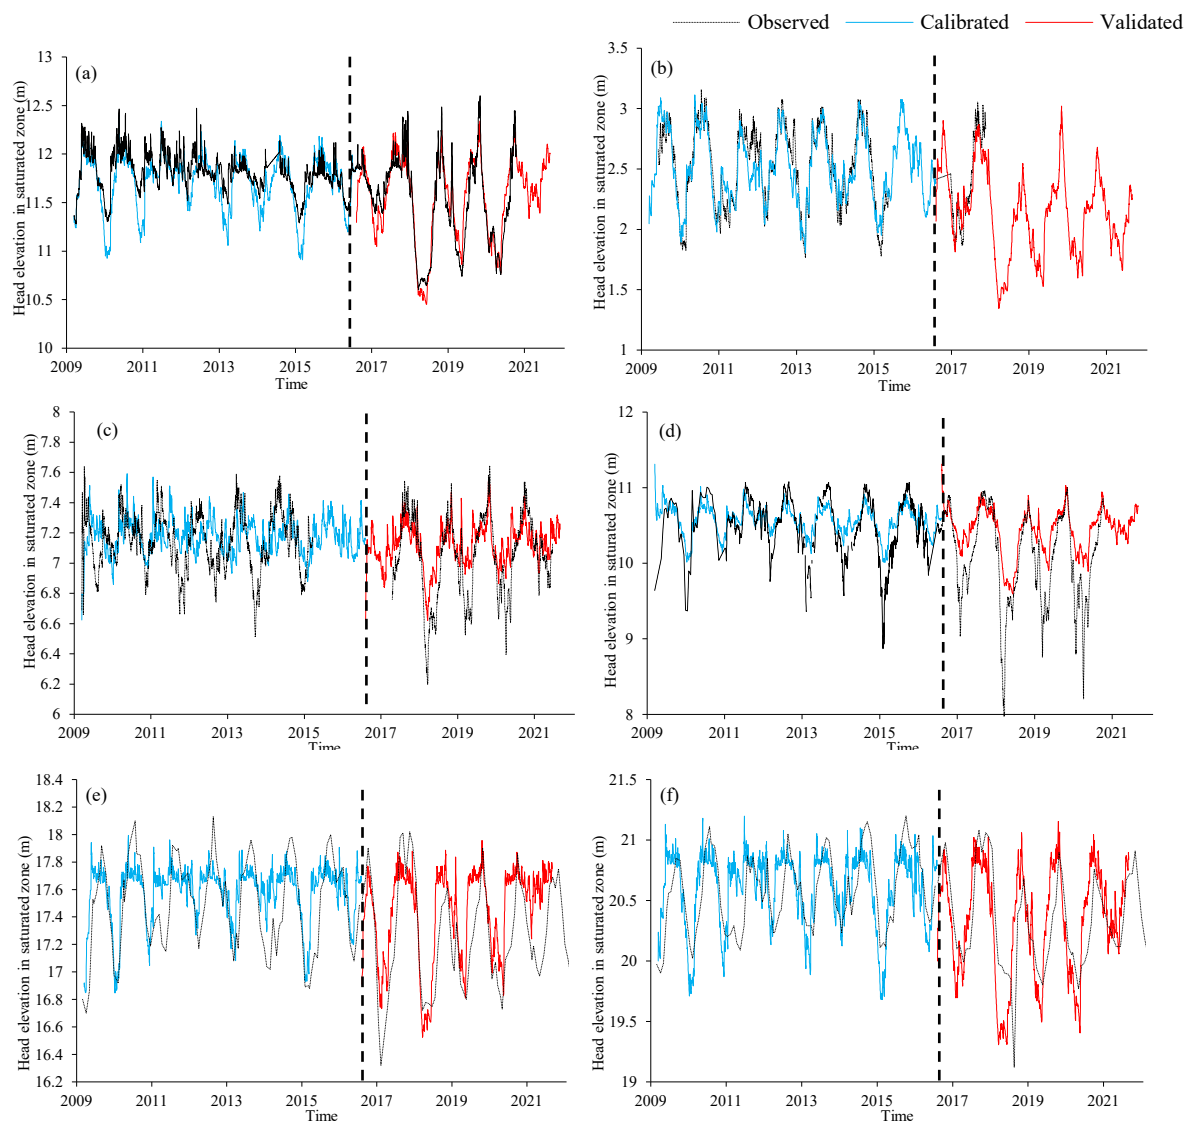

Figure S3: Groundwater level variation for calibration and validation period at (a) 5219 (b) 5170 (c) B50COO78 (d) B50COO77 (e) 1-0342 (f) 1-0344
